# Supplementary material for: A mobile-optimized artificial intelligence system for gestational age and fetal malpresentation assessment
Source: PubMed Central journal article supplement (PMC9553916; doi:10.1038/s43856-022-00194-5), 2022-10-11
Supplement: 43856_2022_194_MOESM1_ESM.pdf [file 43856_2022_194_MOESM1_ESM.pdf]

## **Description of Additional Supplementary Files**

**File Name:** Supplementary Data 1

**Description:** Source data for figures 2 and 3
